# Supplementary material for: Biodegradable black phosphorus-based nanospheres for in vivo photothermal cancer therapy
Source: Nat Commun. 2016 Sep 30;7:12967. doi: 10.1038/ncomms12967 (PMC5056460; doi:10.1038/ncomms12967)
Supplement: Supplementary Information — Supplementary Figures 1-15, Supplementary Table 1 and Supplementary References. [file ncomms12967-s1.pdf]

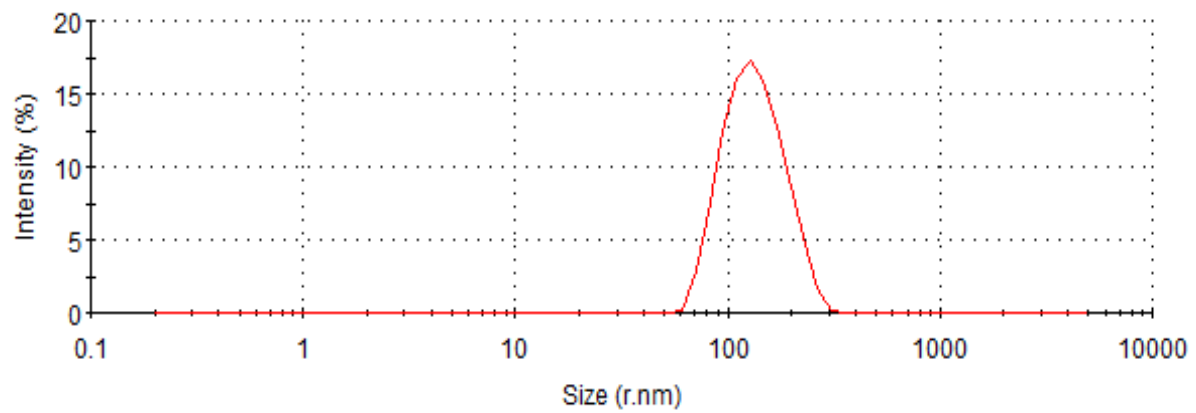

**Supplementary Figure 1 | Measurement of the hydrodynamic size of BPQDs/PLGA NSs.** Average hydrodynamic size of the BPQDs/PLGA NSs.

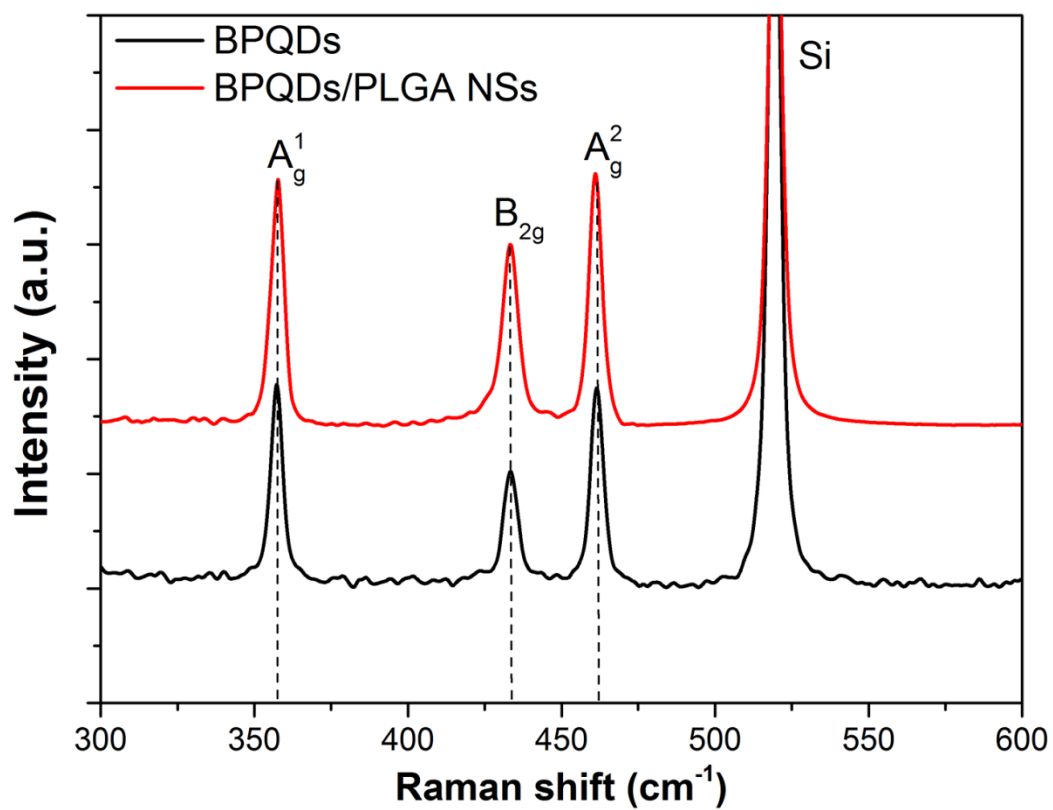

**Supplementary Figure 2 | Raman scattering.** Raman scattering spectra of the BPQDs and BPQDs/PLGA NSs.

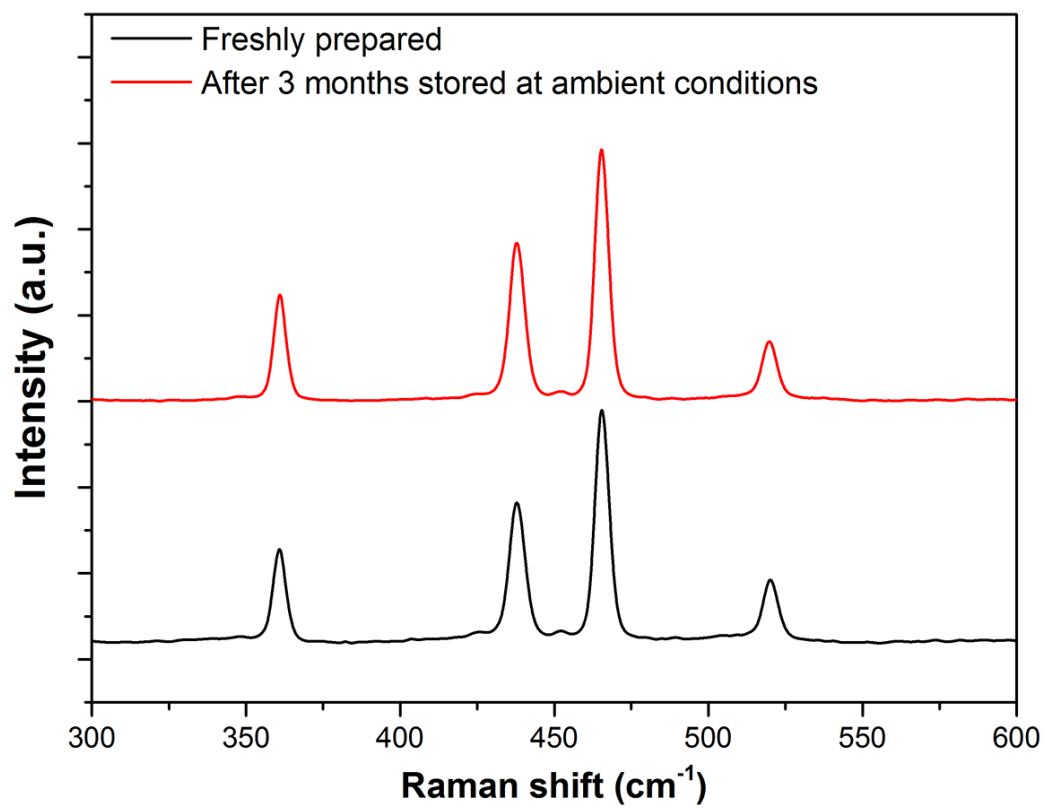

**Supplementary Figure 3 | Raman scattering.** Raman scattering spectra of the BPQDs/PLGA NSs prepared freshly and after storing under ambient conditions for 3 months.

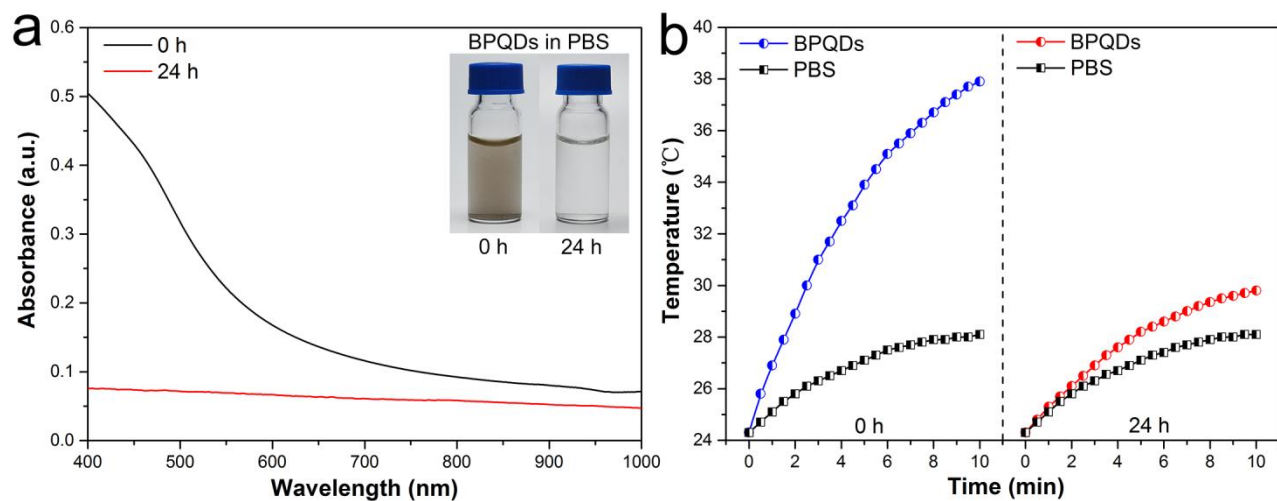

**Supplementary Figure 4 | Biodegradation performance of BPQDs in PBS.** (a) Absorption spectra of the BPQDs dispersed in PBS for 0 and 24 h with the corresponding photographs shown in the inset. (b) Photothermal heating curves of the BPQDs dispersed in PBS for 0 and 24 h.

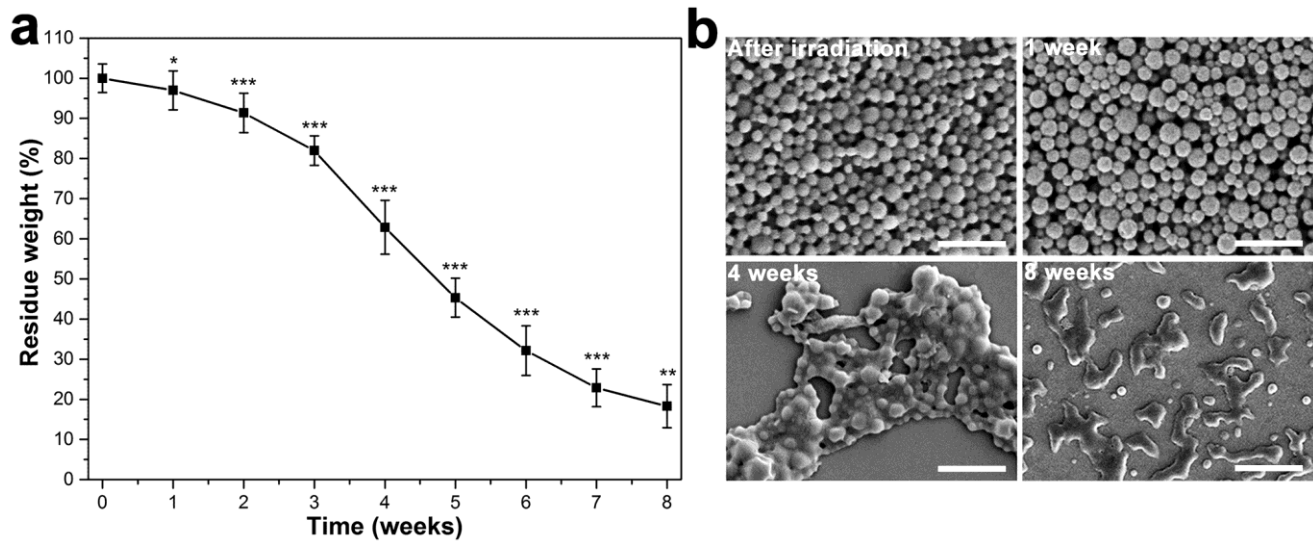

**Supplementary Figure 5 | Biodegradation performance in PBS of BPQDs/PLGA NSs after irradiation by the 808 nm laser ( $1 \text{ W cm}^{-2}$ ) for 10 min.** (a) Residual weight of the NSs irradiated and degraded in PBS as a function of time (n=5; \* $P < 0.05$ , \*\* $P < 0.01$ , \*\*\* $P < 0.001$ ; ANOVA). (b) SEM images of the NSs irradiated and then degraded in PBS for 0, 1, 4, and 8 weeks (scale bars, 500 nm).

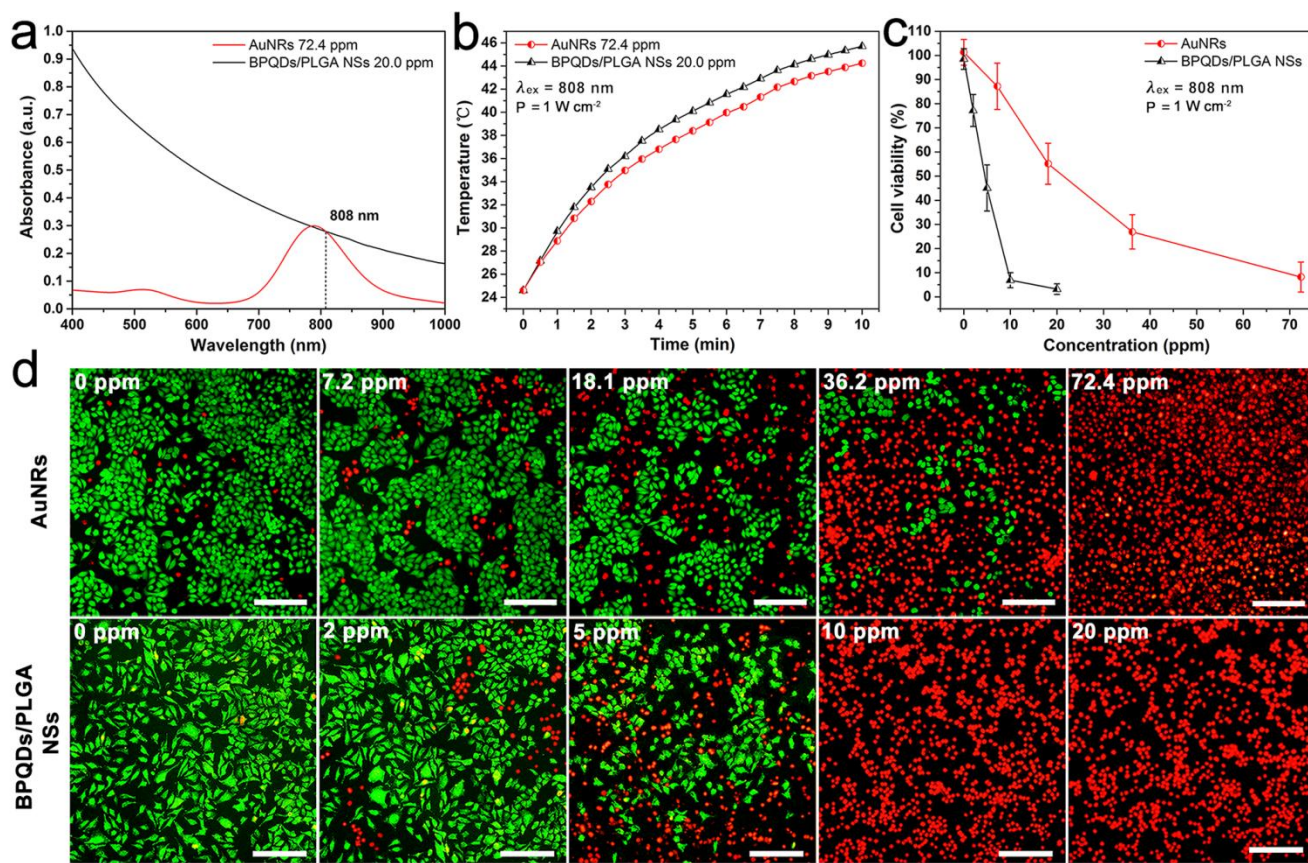

### Supplementary Figure 6 | Comparison of photothermal performance between the BPQDs/PLGA

NSs and AuNRs. (a) Absorption spectra and (b) Photothermal heating curves of the BPQDs/PLGA NSs

(20.0 ppm BPQDs) and AuNRs (72.4 ppm) with the same absorption at 808 nm. The AuNRs as the

positive control are synthesized in an aqueous solution by a common seed-mediated growth method

reported previously<sup>1,2</sup> and BSA is used to conjugate with the AuNRs using a method described

previously<sup>2,3</sup>. (c) Relative viability of the MCF7 cells after incubation with BPQDs/PLGA NSs and

AuNRs with different concentrations (same absorption at 808 nm) for 4 h and irradiated with the 808

nm laser ( $1 \text{ W cm}^{-2}$ ) for 10 min. (d) Corresponding fluorescence images (scale bars, 100  $\mu\text{m}$  for all

panels) of the cells stained with calcein AM (live cells, green fluorescence) and PI (dead cells, red

fluorescence).

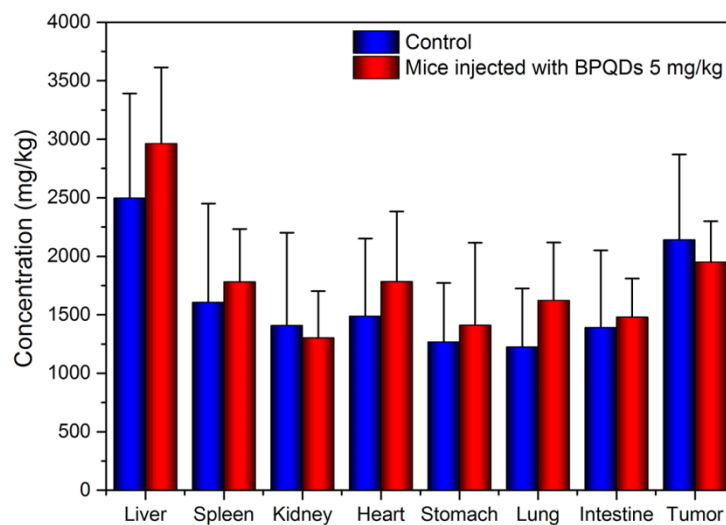

**Supplementary Figure 7 | *In vivo* biodistribution analysis of BPQDs.** The concentrations of P in tumor and major organs of MCF7 breast tumor-bearing mice without or with BPQDs injection (5 mg kg<sup>-1</sup>) are determined by ICP-AES. Since the original P concentrations in the organs are much larger than the injection dose, no meaningful difference can be observed from the P concentrations in all the organs after injection of the BPQDs.

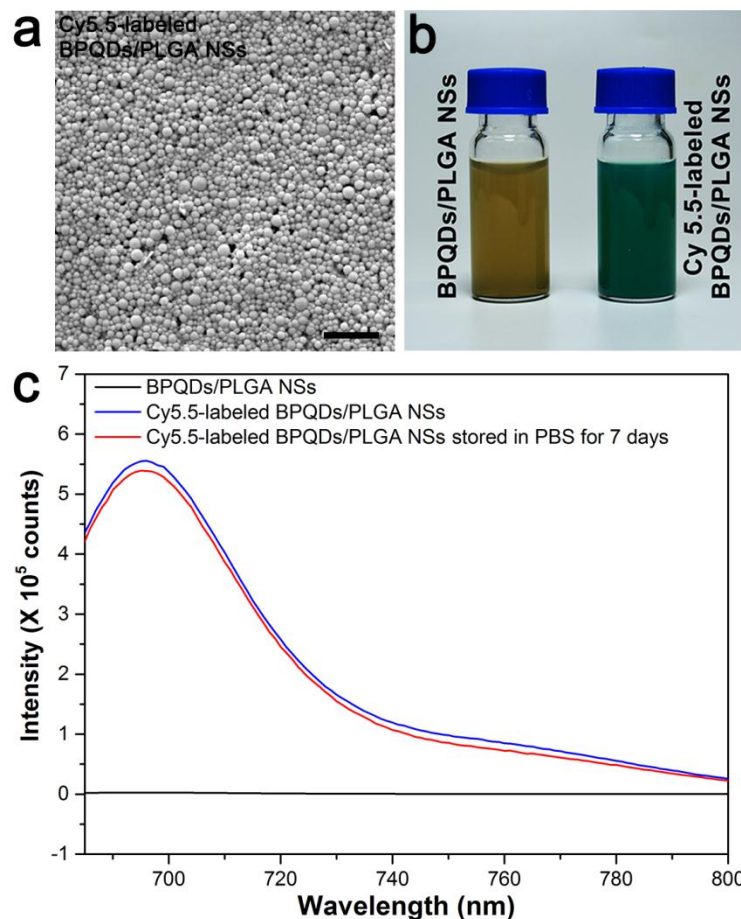

**Supplementary Figure 8 | Characterization of the Cy5.5-labeled BPQDs/PLGA NSs.** (a) SEM image of the Cy5.5-labeled BPQDs/PLGA NSs (scale bar, 1  $\mu\text{m}$ ). (b) Photographs of the BPQDs/PLGA NSs and Cy5.5-labeled BPQDs/PLGA NSs. (c) Emission spectra ( $\lambda_{\text{ex}} = 675 \text{ nm}$ ) of the Cy5.5-labeled BPQDs/PLGA NSs before and after storage in PBS for 7 days. No fluorescence can be observed from the BPQDs/PLGA NSs without Cy5.5 labeling.

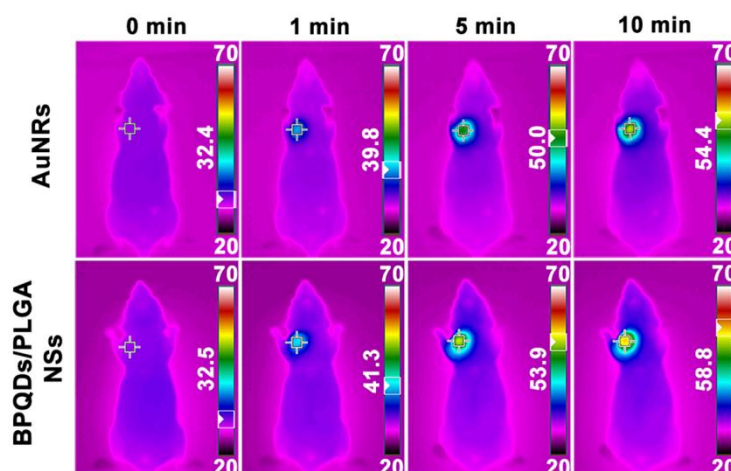

**Supplementary Figure 9 | Photothermal performance comparison of the BPQDs/PLGA NSs and AuNRs for *in vivo* tumor ablation.** Infrared thermographic maps of the tumor-bearing nude mice irradiated by the 808 nm laser ( $1 \text{ W cm}^{-2}$ ) at 24 h after separate intravenous injection with 100  $\mu\text{L}$  of BPQDs/PLGA NSs ( $1 \text{ mg BP mL}^{-1}$ ) and AuNRs ( $3.62 \text{ mg mL}^{-1}$ ) with the color bar referring to the relative temperature.

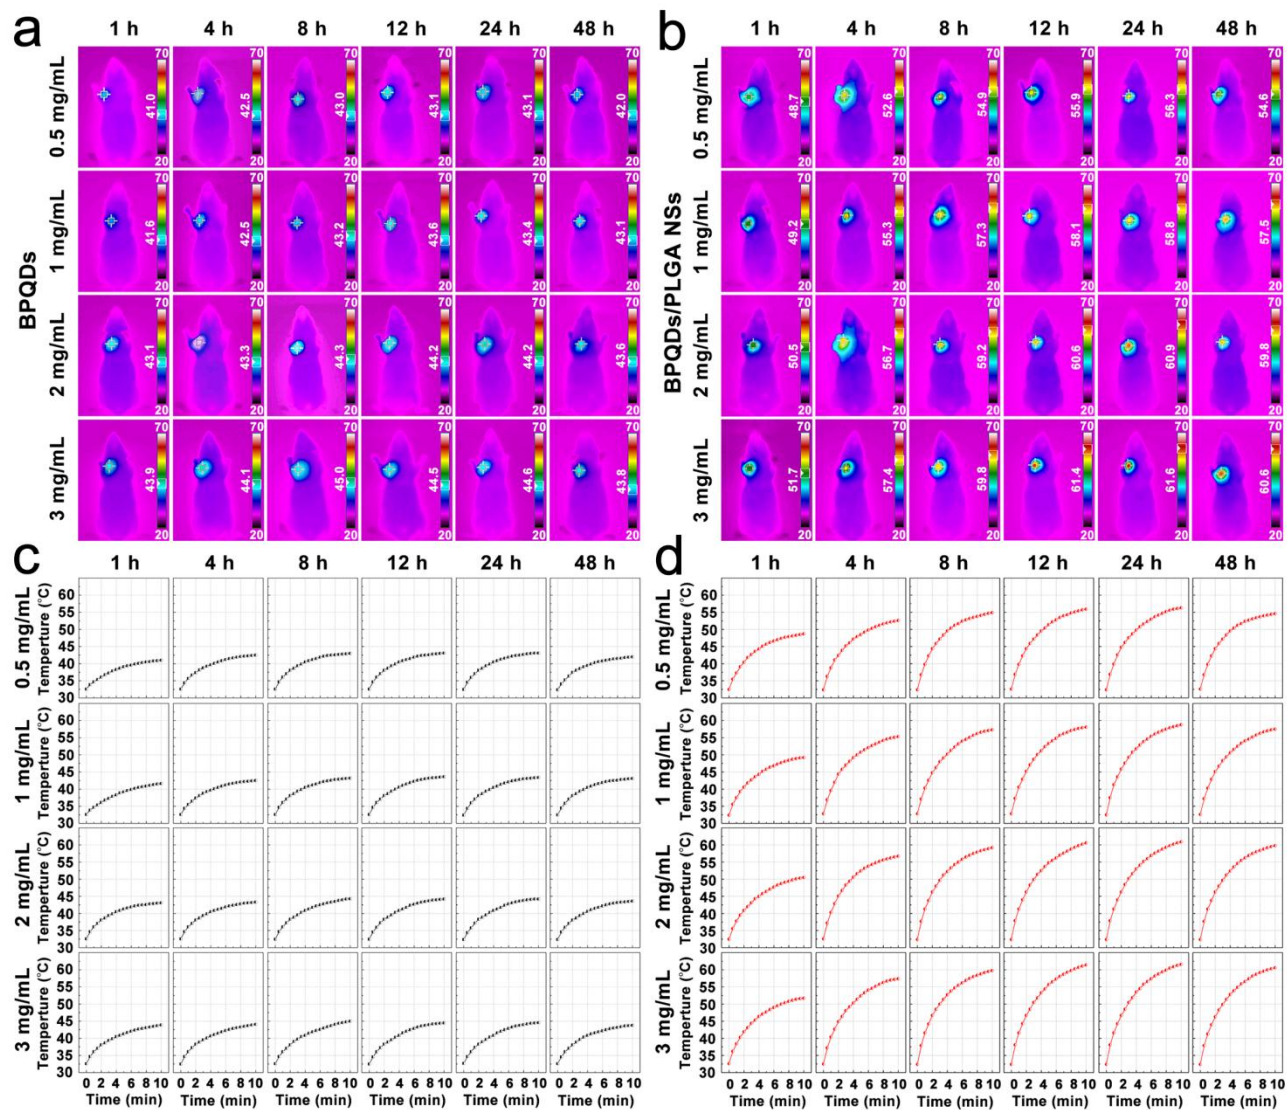

**Supplementary Figure 10 | Photothermal performance comparison between the BPQDs/PLGA NSs and bare BPQDs for *in vivo* tumor ablation.** (a, b) Infrared thermographic maps and (c, d) Time-dependent temperature increase in the tumor-bearing nude mice after separate intravenous injection of the BPQDs and BPQDs/PLGA NSs with different concentrations (0.5, 1, 2 and 3 mg BP mL<sup>-1</sup>) and irradiation with the 808 nm laser (1 W cm<sup>-2</sup>) at different time points (1, 4, 8, 12, 24 and 48 h) after injection. The color bars refer to the relative temperature.

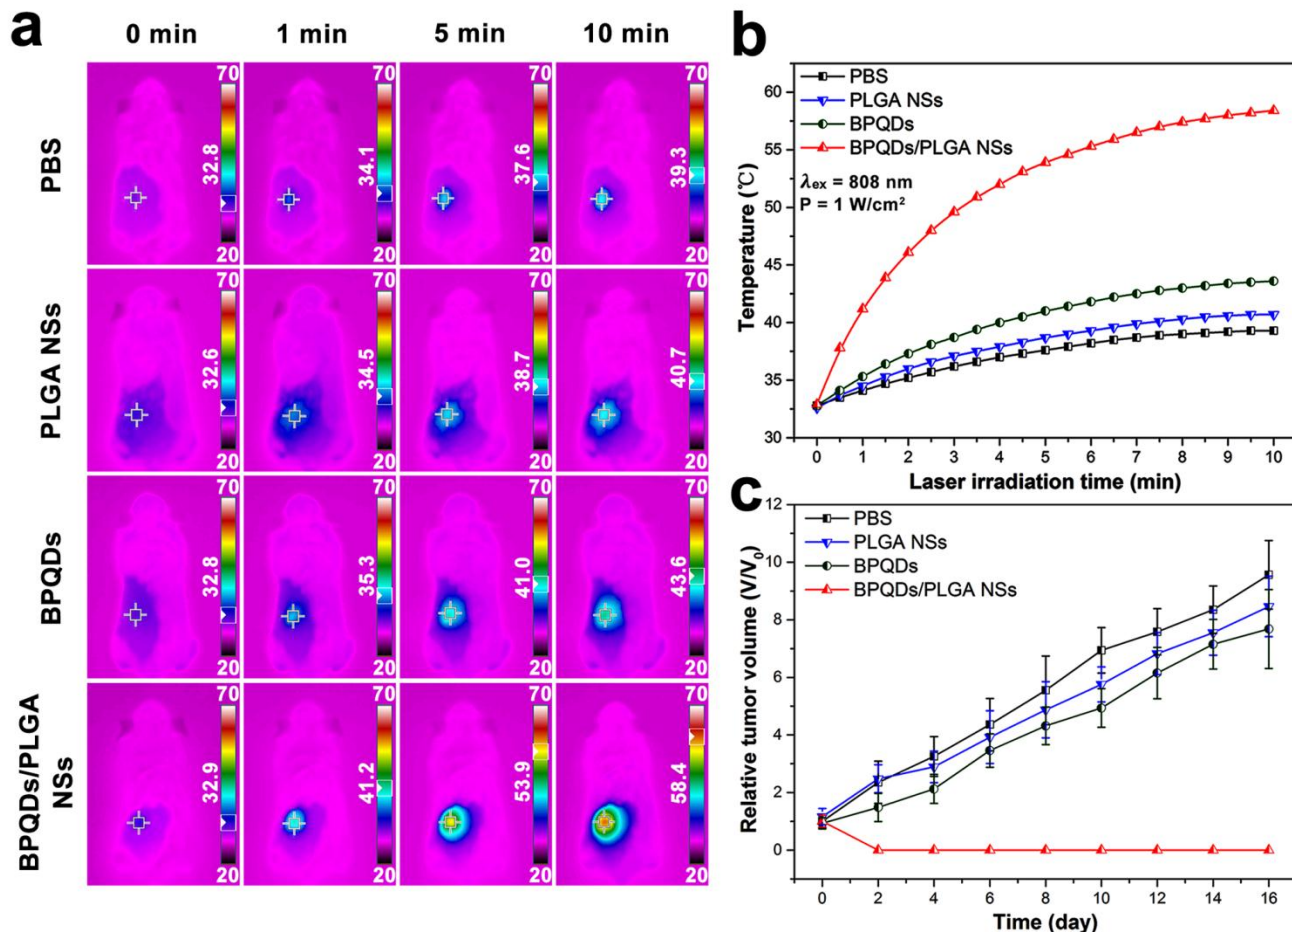

**Supplementary Figure 11 | *In vivo* photothermal cancer therapy in the B16 tumor-bearing mice.**

(a) Infrared thermographic maps and (b) Time-dependent temperature increase in the B16 tumor-bearing nude mice irradiated by the 808 nm laser ( $1 \text{ W cm}^{-2}$ ) at 24 h after separate intravenous injection with 100  $\mu\text{L}$  of PBS, PLGA NSs, BPQDs ( $1 \text{ mg mL}^{-1}$ ) and BPQDs/PLGA NSs ( $1 \text{ mg BP mL}^{-1}$ ) with the color bar referring to the relative temperature. (c) Growth curves of B16 tumor in different groups of mice treated with 100  $\mu\text{L}$  of PBS, PLGA NSs, BPQDs ( $1 \text{ mg mL}^{-1}$ ), and BPQDs/PLGA NSs ( $1 \text{ mg BP mL}^{-1}$ ) with the laser irradiation.

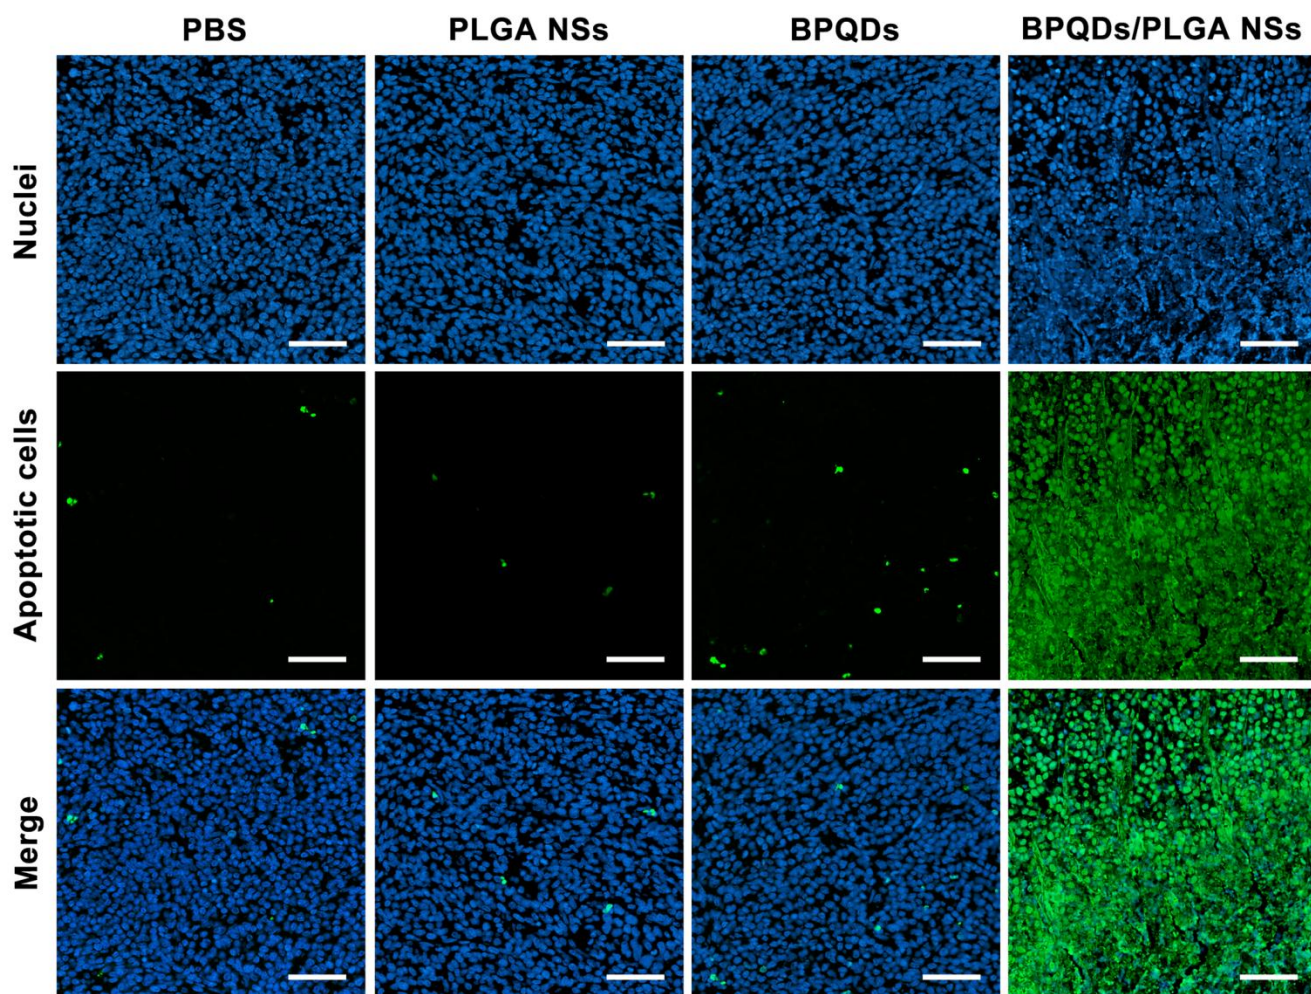

**Supplementary Figure 12 | Apoptosis detection after *in vivo* photothermal cancer therapy.**

Fluorescence microscopy images (scale bars, 50  $\mu\text{m}$  for all panels) of the apoptotic cells in the tumor tissues of the Balb/c nude mice irradiated by the 808 nm laser ( $1 \text{ W cm}^{-2}$ ) at 24 h after separate intravenous injection with 100  $\mu\text{L}$  of PBS, PLGA NSs, BPQDs ( $1 \text{ mg mL}^{-1}$ ) and BPQDs/PLGA NSs ( $1 \text{ mg BP mL}^{-1}$ ). The apoptotic cells are labeled with FITC using the TUNEL assay (shown in green) and the nuclei are stained with DAPI (shown in blue).

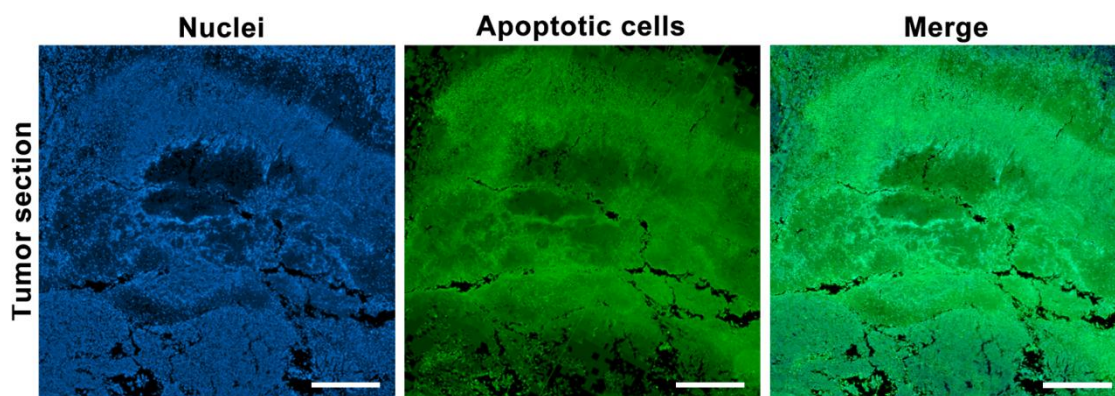

**Supplementary Figure 13 | Apoptosis examination at the macro-organizational level.** Fluorescence microscopy images (scale bars, 500 μm) of the apoptotic cells in the tumor sections at the macro-organizational level (about 10 mm<sup>2</sup>) acquired from the Balb/c nude mice irradiated by the 808 nm laser (1 W cm<sup>-2</sup>) at 24 h after intravenous injection with 100 μL of BPQDs/PLGA NSs (1 mg BP mL<sup>-1</sup>). The apoptotic cells are labeled with FITC using the TUNEL assay (shown in green) and the nuclei are stained with DAPI (shown in blue).

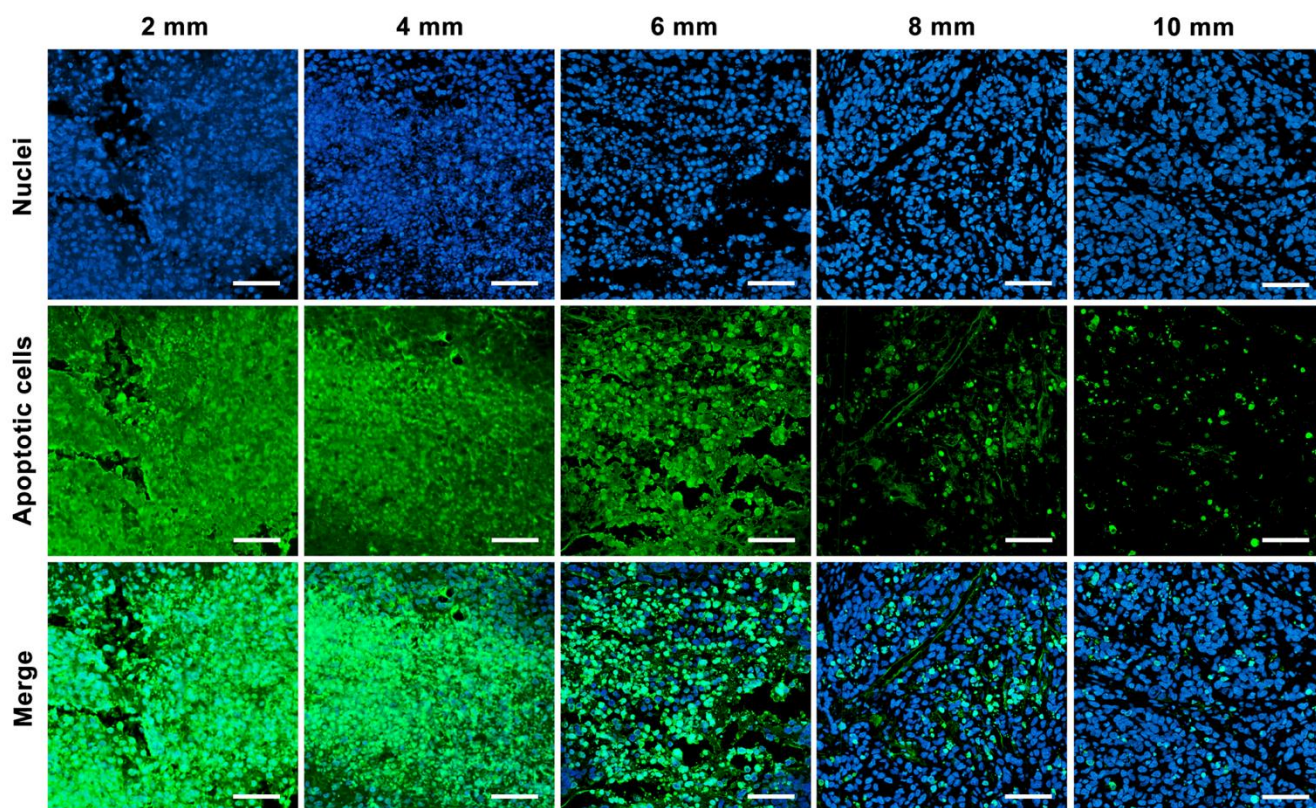

**Supplementary Figure 14 | Apoptosis detection of tumor sections at different depths.** Fluorescence microscopy images (scale bars, 50 µm for all panels) of the apoptotic cells in the tumor sections at different depths of the Balb/c nude mice irradiated by the 808 nm laser ( $1 \text{ W cm}^{-2}$ ) at 24 h after intravenous injection with 100 µL BPQDs/PLGA NSs ( $1 \text{ mg BP mL}^{-2}$ ). The apoptotic cells are labeled with FITC using the TUNEL assays (shown in green) and the nuclei are stained with DAPI (shown in blue).

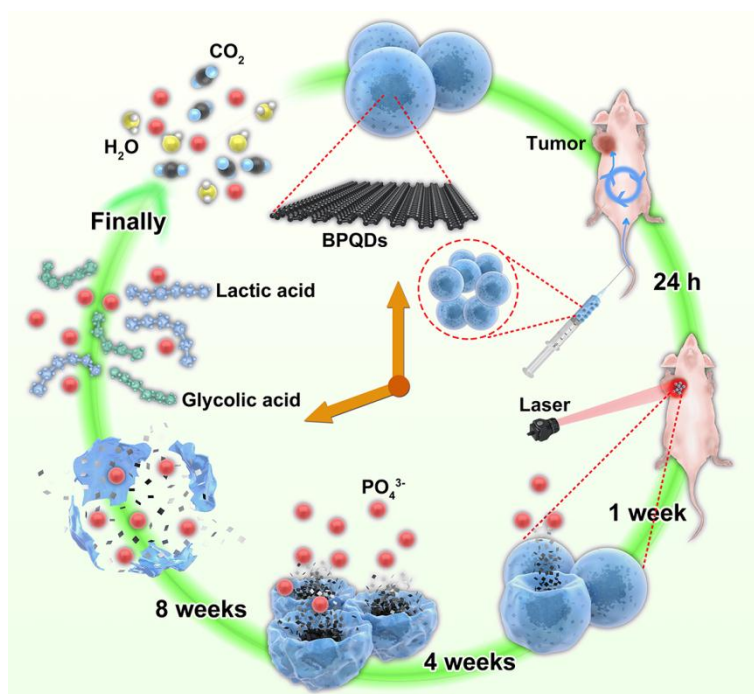

**Supplementary Figure 15 | Schematic representation of the *in vivo* degradation process of the BPQDs/PLGA NSs inside the body.**

|      |        | PBS   |      |      |      |      | PLGA NSs       |      |      |      |      |
|------|--------|-------|------|------|------|------|----------------|------|------|------|------|
| Time | (mm)   | No.1  | No.2 | No.3 | No.4 | No.5 | No.1           | No.2 | No.3 | No.4 | No.5 |
| 0 d  | Length | 10.3  | 7.5  | 8.7  | 7.5  | 8.9  | 8.3            | 8.1  | 8.5  | 9.0  | 7.9  |
|      | Width  | 7.1   | 6.6  | 7.4  | 6.7  | 6.4  | 6.7            | 6.6  | 7.6  | 7.6  | 7.1  |
| 2 d  | Length | 12.8  | 9.1  | 10.5 | 9.3  | 12.4 | 9.1            | 9.4  | 9.6  | 10.5 | 9.5  |
|      | Width  | 9.4   | 8.8  | 9.7  | 9.0  | 8.7  | 7.7            | 7.4  | 8.7  | 8.6  | 8.0  |
| 4 d  | Length | 13.1  | 10.7 | 11.1 | 11.0 | 12.2 | 9.9            | 9.8  | 11.0 | 11.5 | 10.1 |
|      | Width  | 10.3  | 9.3  | 10.5 | 9.4  | 9.9  | 7.8            | 7.7  | 9.1  | 9.2  | 8.8  |
| 6 d  | Length | 14.7  | 12.0 | 12.2 | 12.9 | 14.0 | 10.8           | 10.7 | 12.3 | 12.8 | 11.1 |
|      | Width  | 11.1  | 10.5 | 11.7 | 10.5 | 11.0 | 8.3            | 8.1  | 10.1 | 10.2 | 9.6  |
| 8 d  | Length | 15.2  | 12.6 | 13.3 | 13.4 | 14.7 | 13.3           | 13.3 | 14.3 | 14.7 | 13.2 |
|      | Width  | 12.5  | 11.7 | 12.6 | 11.7 | 12.4 | 10.3           | 10.2 | 11.5 | 11.6 | 11.3 |
| 10 d | Length | 15.7  | 15.2 | 14.6 | 15.2 | 15.6 | 15.5           | 15.4 | 16.6 | 16.3 | 15.7 |
|      | Width  | 14.0  | 12.8 | 13.8 | 13.1 | 13.7 | 12.3           | 12.1 | 12.5 | 12.7 | 12.6 |
| 12 d | Length | 16.1  | 15.8 | 15.3 | 15.7 | 15.9 | 16.3           | 16.2 | 17.2 | 17.2 | 16.1 |
|      | Width  | 15.2  | 13.7 | 14.7 | 13.9 | 14.9 | 12.7           | 12.6 | 13.5 | 13.7 | 13.5 |
| 14 d | Length | 16.6  | 16.5 | 15.9 | 16.5 | 16.4 | 16.9           | 16.7 | 17.6 | 17.8 | 16.8 |
|      | Width  | 15.5  | 14.2 | 15.2 | 14.4 | 15.4 | 13.2           | 13.1 | 14.0 | 14.2 | 13.9 |
| 16 d | Length | 18.2  | 17.3 | 16.9 | 17.1 | 17.7 | 17.5           | 17.6 | 17.9 | 18.3 | 17.3 |
|      | Width  | 16.2  | 14.6 | 15.9 | 14.9 | 16.1 | 13.6           | 13.5 | 14.9 | 15.0 | 14.8 |
|      |        | BPQDs |      |      |      |      | BPQDs/PLGA NSs |      |      |      |      |
| Time | (mm)   | No.1  | No.2 | No.1 | No.2 | No.1 | No.2           | No.1 | No.2 | No.1 | No.2 |
| 0 d  | Length | 7.9   | 8.4  | 7.9  | 9.3  | 8.6  | 8.6            | 8.9  | 8.0  | 7.6  | 8.0  |
|      | Width  | 6.8   | 6.2  | 6.5  | 7.4  | 7.2  | 7.2            | 7.1  | 6.8  | 6.9  | 7.0  |
| 2 d  | Length | 9.9   | 9.4  | 8.4  | 10.5 | 10.4 | 0.0            | 0.0  | 0.0  | 0.0  | 0.0  |
|      | Width  | 7.9   | 6.7  | 7.3  | 8.5  | 8.4  | 0.0            | 0.0  | 0.0  | 0.0  | 0.0  |
| 4 d  | Length | 10.5  | 9.7  | 9.2  | 11.7 | 11.6 | 0.0            | 0.0  | 0.0  | 0.0  | 0.0  |
|      | Width  | 8.1   | 6.9  | 7.5  | 8.8  | 8.7  | 0.0            | 0.0  | 0.0  | 0.0  | 0.0  |
| 6 d  | Length | 12.7  | 12.0 | 12.1 | 13.8 | 13.7 | 0.0            | 0.0  | 0.0  | 0.0  | 0.0  |
|      | Width  | 9.2   | 8.5  | 8.7  | 10.2 | 10.2 | 0.0            | 0.0  | 0.0  | 0.0  | 0.0  |
| 8 d  | Length | 13.7  | 13.3 | 13.6 | 14.4 | 14.5 | 0.0            | 0.0  | 0.0  | 0.0  | 0.0  |
|      | Width  | 10.4  | 9.7  | 9.8  | 11.2 | 11.1 | 0.0            | 0.0  | 0.0  | 0.0  | 0.0  |
| 10 d | Length | 15.1  | 15.9 | 15.9 | 16.5 | 16.1 | 0.0            | 0.0  | 0.0  | 0.0  | 0.0  |
|      | Width  | 11.7  | 10.8 | 11.1 | 12.2 | 12.2 | 0.0            | 0.0  | 0.0  | 0.0  | 0.0  |
| 12 d | Length | 17.1  | 17.6 | 16.7 | 17.7 | 17.0 | 0.0            | 0.0  | 0.0  | 0.0  | 0.0  |
|      | Width  | 12.4  | 11.5 | 12.0 | 13.3 | 13.3 | 0.0            | 0.0  | 0.0  | 0.0  | 0.0  |
| 14 d | Length | 17.5  | 17.7 | 17.5 | 17.9 | 17.4 | 0.0            | 0.0  | 0.0  | 0.0  | 0.0  |
|      | Width  | 13.1  | 12.2 | 12.5 | 13.8 | 13.8 | 0.0            | 0.0  | 0.0  | 0.0  | 0.0  |
| 16 d | Length | 17.6  | 18.0 | 17.7 | 18.2 | 17.5 | 0.0            | 0.0  | 0.0  | 0.0  | 0.0  |
|      | Width  | 13.4  | 12.5 | 12.7 | 14.8 | 14.8 | 0.0            | 0.0  | 0.0  | 0.0  | 0.0  |

**Supplementary Table 1** | Raw measurements for the tumor volumes of MCF7 breast tumor in different groups of nude mice treated with PBS, PLGA NSs, BPQDs and BPQDs/PLGA NSs.

## Supplementary References

1. Shao, J. *et al.* PLLA nanofibrous paper-based plasmonic substrate with tailored hydrophilicity for focusing SERS detection. *ACS Appl. Mater. Interfaces* **7**, 5391-5399 (2015).
2. Li, Z. *et al.* Small gold nanorods laden macrophages for enhanced tumor coverage in photothermal therapy. *Biomaterials* **74**, 144-154 (2016).
3. Ali, M. R. K., Panikkanvalappil, S. R., & El-Sayed, M. A. Enhancing the efficiency of gold nanoparticles treatment of cancer by increasing their rate of endocytosis and cell accumulation using rifampicin. *J. Am. Chem. Soc.* **136**, 4464-4467 (2014).
